# Supplementary material
Source: publisher site journal article supplement (https://www.dovepress.com/article/107107)
Supplement: Supplementary file 1 [file get_supplementary_file.php]

## Supplementary material



**Figure S1.** Mass spectrum and peptide sequence of DP7-C



**Figure S2.** Efficacy of DP7-C and/or AZT formulations in *S. aureus*-infected mouse model. BALB/c mice were infected with  $1 \times 10^8$  CFU/500 $\mu$ l *S. aureus* strain 33591 by i.p. injection, antimicrobial drug was administered 1 h after bacterial challenge. Different dose of AZT-LPs (0.625mg AZT/kg, 1.25mg AZT/kg, 2.5mg AZT /kg), D-LPs (2.5mg DP7-C/kg) and AZT-D-LPs (0.625mg AZT/kg+ 2.5mg DP7-C/kg, 1.25mg AZT/kg+ 2.5mg DP7-C/kg, 2.5mg AZT/kg+ 2.5mg DP7-C/kg) were administered by i.v. injection. Mice were sacrificed 24h later and the number of bacterial in the peritoneal lavage fluid was counted. (\* $P < 0.05$ , \*\* $P < 0.01$  and \*\*\* $P < 0.001$  versus the untreated group, respectively).



**Figure S3.** The cytotoxicity study of different AZT and/or DP7-C formulations on LO2 and HEK293 cells (n=3, mean  $\pm$  SD). Note: Free AZT: 250 $\mu$ g AZT/ml, AZT-LPs: 250 $\mu$ g AZT/ml, D-LPs: 250 $\mu$ g DP7-C/ml, 1.25%AZT-D-LPs: 250 $\mu$ g DP7-C/ml+62.5 $\mu$ g AZT/ml, 2.5%AZT-D-LPs: 250 $\mu$ g DP7-C/ml+125 $\mu$ g AZT/ml, 5%AZT-D-LPs: 250 $\mu$ g DP7-C/ml+250 $\mu$ g AZT/ml.



**Figure S4.** Histological analysis of the main organs of BALB/c mice after treatment with AZT-LPs (0.625mg AZT/kg or 2.5mg AZT /kg) and AZT-D-LPs (0.625mg AZT/kg+ 2.5mg DP7-C/kg or 2.5mg AZT/kg+ 2.5mg DP7-C/kg) formulations.

**Table S1.** Sequences of primers (human) used for quantitative real-time PCR.

| Gene          | Forward primer (5'-3') | Reverse Primer (5'-3') |
|---------------|------------------------|------------------------|
| GAPDH         | TGAAGGACTCATGACCACA    | TTCAGCTCAGGGATGACCTT   |
| IL-1 $\beta$  | CAGATGAAGTGCTCCTTCCA   | ACCAGCATCTTCCTCAGCTT   |
| IL-6          | AATGAGGAGACTTGCCTGGT   | GCAGGAACTGGATCAGGACT   |
| IL-8          | GACCACACTGCGCCAACAC    | CTTCTCCACAACCCTCTGCAC  |
| IL-10         | GGTTGCCAAGCCTTGTCTGA   | AGGGAGTTCACATGCGCCT    |
| MCP-1         | GTGTCCCAAAGAAGCTGTGA   | AATCCTGAACCCACTTCTGC   |
| TNF- $\alpha$ | TGGAGAAGGGTGACCGACTC   | TCCTCACAGGGCAATGATCC   |
| IFN- $\gamma$ | TGTTACTGCCAGGACCCATA   | TTCTGTCACTCTCCTCTTTCCA |
| G-CSF         | CAGAGCTTCCTGCTCAAGTG   | GCACACTCACTCACCAGCTT   |

**Table S2.** Sequences of primers (mouse) used for quantitative real-time PCR.

| Gene           | Forward primer (5'-3')  | Reverse Primer (5'-3') |
|----------------|-------------------------|------------------------|
| $\beta$ -actin | CCCAGGCATTGCTGACAGG     | TGGAAGGTGGACAGTGAGGC   |
| IL-1 $\beta$   | GCAACTGTTCCCTGAACTCAACT | ATCTTTTGGGGTCCGTCAACT  |
| IL-2           | TCACCAGGATGCTCACATT     | GCACTTCCTCCAGAGGTTTG   |
| MCP-1          | AAAACCTGGATCGGAACCAAAT  | AGACCTTAGGGCAGATGCAGTT |
| TNF- $\alpha$  | TCTTCTCATTCCCTGCTTGTGG  | GGTCTGGGCCATAGAACTGA   |

**Table S3.** Properties of AZT-LPs and AZT-D-LPs

| Groups                             | Formulations    | Encapsulation efficiency of AZT (%) | Mean size (nm) | Polydispersity index (PDI) | Zeta potential (mV) |
|------------------------------------|-----------------|-------------------------------------|----------------|----------------------------|---------------------|
| Non-modified AZT loaded liposome   | 1.25%AZT-LPs    | 99.95%±1.68%                        | 96.07±0.18     | 0.24±0.01                  | -0.45±0.92          |
|                                    | 2.5%AZT-LPs     | 99.26%±1.97%                        | 99.60±1.82     | 0.25±0.01                  | -1.71±0.64          |
|                                    | 5% AZT-LPs      | 98.62%±2.21%                        | 97.11±0.53     | 0.24±0.01                  | -0.31±0.99          |
|                                    | 10% AZT-LPs     | 98.88%±1.10%                        | 98.98±0.43     | 0.27±0.01                  | -0.46±0.09          |
| DP7-C modified AZT loaded liposome | 1.25% AZT-D-LPs | 97.88%±1.52%                        | 100.75±0.49    | 0.23±0.01                  | 3.72±0.28           |
|                                    | 2.5% AZT-D-LPs  | 98.10%±2.37%                        | 103.80±1.84    | 0.24±0.01                  | 4.95±0.32           |
|                                    | 5% AZT-D-LPs    | 97.22%±1.21%                        | 102.97±0.92    | 0.27±0.01                  | 5.26±0.98           |
|                                    | 10% AZT-D-LPs   | 97.65%±0.81%                        | 106.30±1.12    | 0.28±0.01                  | 4.98±0.45           |

Note: D: DP7-C; AZT: azithromycin; and LPs: liposomes. Data are shown as mean ± SD (n=3).

**Table S4.** Blood cells analysis in BALB/c mice after treatment with different AZT and/or DP7-C formulations (DP7-C dosage of 2.5mg/kg and AZT dosage of 1.25mg/kg).

| Groups          | Untreated          | AZT-LPs             | D-LPs              | AZT-D-LPs          |
|-----------------|--------------------|---------------------|--------------------|--------------------|
| WBC(K/ $\mu$ L) | 4.96 $\pm$ 0.83    | 6.40 $\pm$ 1.31     | 7.00 $\pm$ 1.45    | 6.16 $\pm$ 0.68    |
| RBC(M/ $\mu$ L) | 9.51 $\pm$ 1.26    | 9.99 $\pm$ 1.03     | 9.93 $\pm$ 0.61    | 10.88 $\pm$ 0.50   |
| HGB(g/dL)       | 169.00 $\pm$ 20.87 | 176.00 $\pm$ 19.89  | 175.00 $\pm$ 13.55 | 191.40 $\pm$ 8.35  |
| PLT(K/ $\mu$ L) | 141.75 $\pm$ 44.25 | 356.20 $\pm$ 102.16 | 206.00 $\pm$ 76.21 | 207.00 $\pm$ 71.02 |

Note: WBC, white blood cell; RBC, red blood cell; HGB, hemoglobin; PLT, platelet;

**Table S5.** Serological and biochemical analysis for BALB/c mice after treatment with different AZT and/or DP7-C formulations (DP7-C dosage of 2.5mg/kg, AZT dosage of 1.25mg/kg).

| Groups    | Untreated   | AZT-LPs     | D-LPs         | AZT-D-LPs    |
|-----------|-------------|-------------|---------------|--------------|
| ALT (U/L) | 55.2±11.95  | 40.5±10.63  | 43.4±6.80     | 69.5±13.77   |
| AST (U/L) | 104.2±11.17 | 103.8±28.93 | 112.8±20.91   | 124.2±17.96  |
| ALP (U/L) | 149.2±1.77  | 166.4±14.43 | 166.2±11.95   | 162±11.38    |
| LDH (U/L) | 567.8±73.95 | 605.2±55.21 | 702±91.37     | 718±99.80    |
| CK (U/L)  | 475±138.87  | 448±31.15   | 532.00±190.21 | 511.2±113.98 |
| CREA (µM) | 1.8±0.45    | 2±1.00      | 2.6±1.52      | 2.6±0.55     |
| BUN (m M) | 5.96±0.44   | 6.6±0.70    | 6.62±1.29     | 6.66±0.73    |
| UA (µM)   | 50.4±7.06   | 55±6.16     | 54.25±4.86    | 54.8±5.02    |
| TP (g/L)  | 52.04±1.93  | 53.84±1.56  | 54.84±4.05    | 53.3±2.33    |
| ALB (g/L) | 30.86±1.13  | 33.18±1.12  | 33.02±2.15    | 32.36±0.90   |
| GLU (m M) | 7.86±0.60   | 8.30±0.39   | 7.146±0.90    | 8.41±0.57    |
| CHO (m M) | 2.58±0.24   | 2.55±0.19   | 2.55±0.31     | 2.46±0.24    |
| TG (m M)  | 4.666±2.31  | 5.31±1.79   | 5.71±1.80     | 4.85±1.32    |
| HDL (m M) | 0.94±0.13   | 0.97±0.10   | 0.94±0.14     | 0.96±0.12    |
| LDL (m M) | 0.07±0.01   | 0.06±0.01   | 0.06±0.01     | 0.07±0.01    |

Note: ALT, aspartate transaminase; AST, aspartate aminotransferase; ALP, alkaline phosphatase; LDH, lactate dehydrogenase; CK, creatine kinase; BUN, urea nitrogen; Crea, creatinine; UA, uric acid; TP, total protein; ALB, albumin; GLU, glucose; TC, total cholesterol; LDL, low density lipoprotein-cholesterol; HDL, high density lipoprotein-cholesterol; TG, triglycerides;
